# Supplementary material
Source: Springer Nature journal article supplement (https://www.springermedizin.de/resource/supplementary/13019_2012_1376_MOESM1_ESM.pdf/9639272)

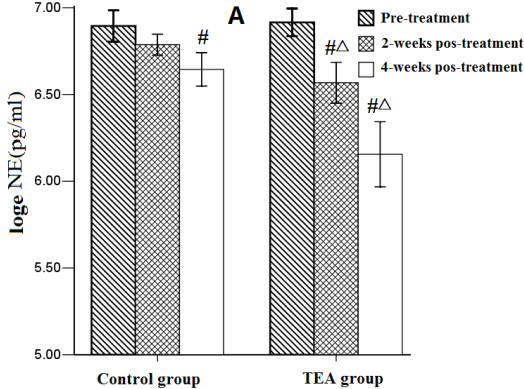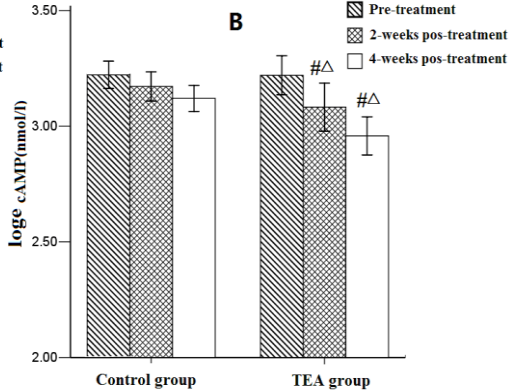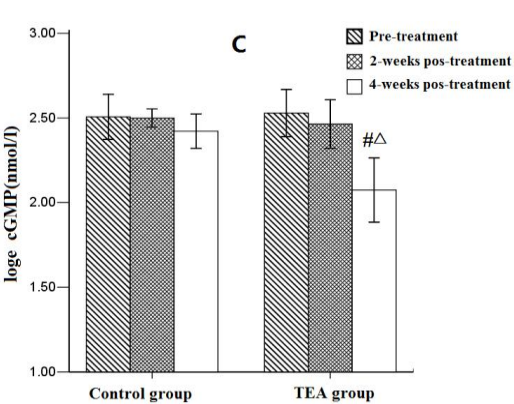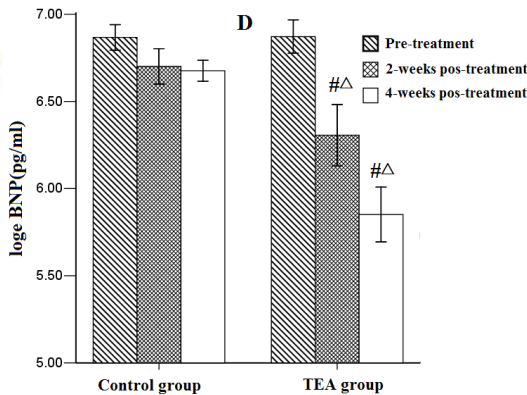

Supplement: MOESM1 [file 9639272]
